# Supplementary material for: Heme Oxygenase-1 Induction by Hemin: A Novel Approach to Enhance Mitochondrial Turnover and Mitigate Diet-Induced Liver Damage
Source: Research Square preprint supplement (doi:10.21203/rs.3.rs-7294790/v1), 2025-12-19
Supplement: Supplementary file 1 [file bf3b2b7f897051968c6ae0d0.docx]

| Primer | Forward (5'-3') | Reverse (5'-3') |
| --- | --- | --- |
| *β-Actin* | CCACACCCGCCACCAGTTC | GACCCATTCCCACCATCACACC |
| *Acc1* | ATGAACACCCAGAGCATTGTCCAG | AGCAGATCCATCACCACAGCCTT |
| Acox1α | TCGAAGCCAGCGTTATGAGG | TTGAGGCCAACAGGTTCCAC |
| Arginase 1 | GGCGTTGACCTTGTCTTGTT | GTGATGCCCCAGATGACTTT |
| *Bax* | CCAGGACGCATCCACCAAGA | AGCTGCCACACGGAAGAAGA |
| *Bcl-2* | GGCTACGAGTGGGATACTGGAGAT | CTCTCAGGCTGGAAGGAGAAGATG |
| *Bcl-xL* | AACGGCGGCTGGGAC | TGAAGAGTGAGCCCAGCAGAAC |
| *Cd36* | CACAGGCTTTCCTTCTTTGC | CTCTGACATTTGCAGGTCCA |
| *Chop* | CTCTGCCTTTCGCCTTTGA | GCTTTGGGAGGTGCTTGTG |
| *ChREBP* | ATAGAGGAGCTCAATGCTGCCAT | AACATGTCCCGCATCTGGTC |
| *Clec4f* | TGTCATCCTACAGCCCCAAG | GAGAGAGAAGAACACAGTCACC |
| *Cpt1*α | ACGAAGCCCTCAAACAGA | GGATGAAATCACACCCAC |
| *Fas* | CTTTGTGAGCCTCACCGCCAT | ATGCCATCAGGTTTCAGCCCC |
| *HO-1* | CCCCAGCGTCATGGCCACTTT | ACCCACCCCTCAAAAGACAGCC |
| *IL-10* | GTTGCCAAGCCTTGTCAGAAA | TTTCTGGGCCATGGTTCTCT |
| *IL-1β* | CACCTCTCAAGCAGAAGCACAG | GGGTTCCATGGTGAAGTCAAC |
| *Lamp1* | TCTGCCTCCTTTCTGACCAC | CAAAGGTGATTGCGAGGGTG |
| *Lcad* | TAGCCATGACAGAGCCTGGG | TGACGGCCACTACGATCAC |
| mtDNA | CAAACCTTTCCTGCACCTCC | AGGCGTTCTGATGATGGGAA |
| *Mrc1* | CAAGGAAGGTTGGCATTTGT | GGAACGTGTGCTCTGAGTT |
| *Nos2* | CTTGGAGCGAGTTGTGGATTG | GGTGGGAGGGGTAGTGATGTC |
| *p58IPK* | ATTAAAGCATACCGAAAGTTAGCAC | AGAGGGTCTTCTCCGTCATCAAA |
| *PDE4genom* | GTTCCCGCCTTCTTCCTCTG | GTTTGCTTGCCGACTCCTTG |
| *Pgc1α* | GTGCAGCCAAGACTCTGTATGG | GTCCAGGTCATTCACATCAAGTTC |
| *Pparα* | AAGAACCTGAGGAAGCCA | AGCCACAAAAAGGGAAATG |

**Supplementary table 1:** primers used in this study.

|  |  |  |
| --- | --- | --- |
| **Antibodies** | **Use** | **Catalog number** |
| ***3-Nitrotyrosin*** | IF | MAB3248 |
| ***ATF4*** | WB | D4B8 |
| ***β-Actin*** | WB | (C4) sc-47778 |
| ***Caspase 3 p17*** | WB | (D-12) sc-373730 |
| ***Clec4f*** | IF | AF2784 |
| ***DRP1*** | WB | (C-5): sc-271583 |
| ***GRP78*** | WB | (A-10) sc-376768 |
| ***HO-1*** | IF | ADI-SPA-896 |
| ***IBA-1*** | WB | ab5076 |
| IF |
| ***Lamin B*** | WB | (M-20) sc-6217 |
| ***LC3-II*** | WB | D3U4C |
| ***MFN2*** | WB | D2D10 |
| ***OPA1*** | WB | (D-9): sc-393296 |
| ***p62*** | WB | (H-290) sc-25575 |
| ***pAKT1 Ser473*** | WB | 9271 |
| ***pAMPKα (Thr172)*** | WB | D4D6D |
| ***Parkin*** | WB | MAB5512-I |
| ***PEPCK*** | WB | (F-3): sc-271029 |
| ***PGC1α*** | WB | (4A8): sc-517380 |
| ***pNFKBp65*** | WB | (A-8): sc-166748 |
| ***PPARα*** | WB | (H-2): sc-398394 |
| ***TOM20*** | IF  WB | (F-10) sc-17764 |
| ***XBP-1*** | WB | (M-186) sc-7160 |
| ***Goat anti mouse IgG HRP conjugated*** | WB | HAF007 |
| ***Goat anti rabbit IgG HRP conjugated*** | WB | 170-6515 |
| ***Rabbit anti goat IgG HRP conjugated*** | WB | HAF017 |
| ***TRICT donkey anti goat*** | IF | 705-025-003 |
| ***Alexa fluor 488 goat anti rabbit*** | IF | 711-545-152 |
| ***Cy3 goat anti mouse*** | IF | 115-165-003 |

**Supplementary table 2:** antibodies used in this study.
